# Supplementary material
Source: publisher figshare collection journal article supplement (https://geolsoc.figshare.com/ndownloader/files/5427230)
Supplement: Supplementary file 1 [file 5427230]

Results of the ion microprobe sulphur isotope analyses
Sample ID	32S cps	cps sample / average standard	?34S	�1?	?33S	�1?
Epoxy pucks
Sample 1 (pyrite concretions at 130-127 cm in MGML-06-7)
1_burrow-like_conc_1_fram_1	291	0.67	26.28	0.32	13.47	0.31
1_burrow-like_conc_1_fram_2	459	1.06	14.69	0.28	7.99	0.28
1_burrow-like_conc_1_matrix_1	222	0.52	27.17	0.38	14.35	0.25
1_burrow-like_conc_1_matrix_2	30	0.07	10.30	0.4	5.45	0.29
1_burrow-like_conc_2_fram_3	478	1.11	16.27	0.62	8.47	0.37
1_burrow-like_conc_2_matrix_3	453	1.05	21.41	0.26	11.49	0.24
1_burrow-like_conc_3_fram_4	331	0.77	9.57	0.34	4.83	0.34
1_burrow-like_conc_3_matrix_4	437	1.01	-4.89	0.37	-2.10	0.27
1_irregular_conc_4_spot_1	98	0.23	3.19	0.26	1.75	0.28
1_irregular_conc_4_spot_2	519	1.20	-0.23	0.35	-0.21	0.28
1_irregular_conc_4_spot_3	453	1.05	2.17	0.37	1.23	0.28
1_irregular_conc_4_spot_4	466	1.08	-3.47	0.35	-1.74	0.3
1_irregular_conc_4_spot_5	440	1.02	-0.67	0.29	-0.21	0.24
1_irregular_conc_4_spot_6	491	1.14	-7.60	0.25	-3.72	0.26
1_irregular_conc_4_spot_7	490	1.13	-11.97	0.45	-6.22	0.27
1_irregular_conc_4_spot_8	443	1.03	-9.14	0.26	-4.72	0.23
1_irregular_conc_4_spot_9	758	1.76	-8.29	0.29	-3.84	0.25
1_irregular_conc_4_spot_10	512	1.18	-6.64	0.24	-3.04	0.23
1_irregular_conc_4_spot_11	467	1.08	-7.09	0.3	-3.55	0.25
1_irregular_conc_4_spot_12	442	1.02	-1.36	0.26	-0.04	0.25
1_irregular_conc_4_spot_13	462	1.07	-3.91	0.3	-1.94	0.24
1_irregular_conc_4_spot_14	466	1.08	-3.47	0.32	-1.66	0.26
1_irregular_conc_4_spot_15	484	1.12	-1.51	0.26	-0.64	0.23
1_irregular_conc_4_spot_16	429	0.99	4.72	0.37	2.66	0.29
1_irregular_conc_4_spot_17	453	1.05	0.43	0.27	0.36	0.25
1_irregular_conc_4_spot_18	371	0.86	4.33	0.32	2.26	0.3
1_irregular_conc_4_spot_19	452	1.05	11.92	0.37	6.11	0.29
1_irregular_conc_5_spot_1	562	1.30	4.22	0.38	2.10	0.26
1_irregular_conc_5_spot_2	441	1.02	-0.05	0.34	-0.30	0.33
1_irregular_conc_5_spot_3	594	1.37	-3.53	0.39	-1.73	0.27
1_irregular_conc_5_spot_4	515	1.19	1.38	0.56	0.76	0.37
1_irregular_conc_5_spot_5	443	1.03	-3.73	0.28	-1.62	0.25
1_irregular_conc_5_spot_6	471	1.09	-5.81	0.25	-2.71	0.23
1_irregular_conc_5_spot_7	496	1.15	-5.25	0.28	-2.48	0.25
1_irregular_conc_5_spot_8	527	1.22	-7.06	0.27	-3.13	0.25
1_irregular_conc_5_spot_9	476	1.10	-4.65	0.25	-2.08	0.25
1_irregular_conc_5_spot_10	463	1.07	-4.71	0.26	-2.36	0.26
1_irregular_conc_5_spot_11	366	0.85	0.17	0.3	-0.15	0.29
1_irregular_conc_5_spot_12	429	0.99	-2.09	0.38	-0.83	0.31
1_irregular_conc_5_spot_13	474	1.10	-2.64	0.25	-1.36	0.24
1_irregular_conc_5_spot_14	325	0.75	-3.49	0.33	-1.25	0.39
1_irregular_conc_6_spot_1	563	1.30	4.38	0.33	1.76	0.3
1_irregular_conc_6_spot_2	533	1.24	1.88	0.47	0.79	0.33
1_irregular_conc_6_spot_3	465	1.08	1.17	0.28	0.97	0.24
1_irregular_conc_6_spot_4	499	1.15	-0.95	0.32	-0.56	0.26
1_irregular_conc_6_spot_5	358	0.84	4.11	0.36	2.29	0.26
1_irregular_conc_6_spot_6	499	1.16	2.18	0.28	1.07	0.32
1_irregular_conc_6_spot_7	325	0.76	3.80	0.25	2.25	0.26
1_irregular_conc_6_spot_8	555	1.29	-2.23	0.38	-0.89	0.31
1_irregular_conc_6_spot_9	435	1.01	1.59	0.27	1.03	0.26
1_irregular_conc_6_spot_10	406	0.94	-3.45	0.27	-1.84	0.26
1_irregular_conc_6_spot_11	239	0.56	-6.40	0.36	-3.42	0.34
1_irregular_conc_6_spot_12	407	0.95	-1.54	0.24	-0.68	0.19
1_irregular_conc_6_spot_13	341	0.80	2.21	0.27	1.04	0.24
1_irregular_conc_6_spot_14	364	0.85	1.43	0.2	1.08	0.22
1_irregular_conc_6_spot_15	307	0.72	-2.02	0.3	-1.25	0.31
1_irregular_conc_6_spot_16	375	0.87	-1.15	0.37	-0.55	0.29
1_irregular_conc_6_spot_17	387	0.90	-0.23	0.22	0.23	0.22
1_irregular_conc_6_spot_18	354	0.83	2.34	0.23	0.94	0.28
1_irregular_conc_6_spot_19	456	1.06	3.79	0.19	1.26	0.21
1_irregular_conc_6_spot_20	24	0.06	4.04	0.22	1.68	0.2
1_irregular_conc_6_spot_21	297	0.69	-0.18	0.2	0.33	0.26
1_irregular_conc_6_spot_22	478	1.11	6.96	0.36	3.09	0.3
1_irregular_conc_6_spot_23	335	0.78	7.16	0.43	7.30	1.9
1_irregular_conc_6_spot_24	418	0.97	3.94	0.42	3.67	2.9
1_burrow-like_conc_7_fram_5	290	0.68	22.85	0.29	11.73	0.27
1_burrow-like_conc_7_fram_6	327	0.76	24.33	0.36	12.12	0.35
1_burrow-like_conc_7_fram_7	465	1.08	25.17	0.21	13.25	0.24
1_burrow-like_conc_7_matrix_5	301	0.70	-4.75	0.46	-2.36	0.3
1_burrow-like_conc_7_matrix_6	276	0.64	2.01	0.28	1.27	0.25
1_burrow-like_conc_7_matrix_7	288	0.67	5.12	0.26	2.66	0.21
1_burrow-like_conc_8_fram_8	314	0.73	16.73	0.37	8.85	0.28
1_burrow-like_conc_8_fram_9	434	1.00	15.92	0.29	8.12	0.35
1_burrow-like_conc_8_fram_10	461	1.07	17.61	0.38	9.04	0.38
1_burrow-like_conc_8_matrix_8	456	1.06	24.61	0.26	12.74	0.27
1_burrow-like_conc_8_matrix_9	302	0.70	0.98	0.42	1.02	0.35
1_burrow-like_conc_8_matrix_10	309	0.72	20.36	0.3	10.73	0.27
1_burrow-like_conc_9_fram_1	323	0.75	29.73	0.19	15.43	0.23
1_burrow-like_conc_9_fram_2	296	0.69	23.84	0.28	12.23	0.28
1_burrow-like_conc_9_matrix_1	306	0.71	-8.47	0.28	-3.66	0.26
1_burrow-like_conc_9_matrix_2	317	0.74	15.10	0.24	7.57	0.26
Sample 2 (pyrite concretions at 110-107 cm in MGML-06-7)
2_burrow-like_conc_1_fram_1	280	0.61	-32.82	0.41	-16.89	0.29
2_burrow-like_conc_1_fram_2	268	0.58	-9.70	0.5	-5.18	0.38
2_burrow-like_conc_1_fram_3	286	0.62	-9.98	0.62	-5.18	0.42
2_burrow-like_conc_1_fram_4	274	0.59	-19.45	0.66	-10.58	0.49
2_burrow-like_conc_1_fram_5	276	0.60	-15.94	0.31	-8.58	0.29
2_burrow-like_conc_1_matrix_3	299	0.65	-29.88	0.33	-15.63	0.29
2_burrow-like_conc_2_fram_6	300	0.65	7.05	0.32	3.08	0.29
2_burrow-like_conc_2_fram_7	291	0.63	-32.87	0.47	-16.64	0.35
2_burrow-like_conc_2_fram_8	296	0.64	-1.68	0.62	-1.71	0.41
2_burrow-like_conc_2_fram_9	318	0.69	-31.48	0.4	-16.51	0.27
2_burrow-like_conc_2_matrix_5	280	0.61	-36.93	0.48	-18.80	0.32
2_burrow-like_conc_2_matrix_6	292	0.63	-35.58	0.35	-18.11	0.3
2_burrow-like_conc_2_matrix_7	281	0.61	-37.41	0.45	-19.69	0.29
2_burrow-like_conc_2_matrix_8	309	0.67	-38.49	0.44	-19.97	0.37
2_burrow-like_conc_3_fram_10	306	0.66	-36.32	0.39	-18.86	0.27
2_burrow-like_conc_3_fram_11	318	0.69	-36.28	0.39	-18.87	0.35
2_burrow-like_conc_3_fram_12	302	0.65	-0.99	0.47	-0.90	0.38
2_burrow-like_conc_3_matrix_10	310	0.67	-30.56	0.73	-16.05	0.39
2_burrow-like_conc_3_matrix_11	300	0.65	-38.00	0.42	-19.66	0.31
2_burrow-like_conc_3_matrix_12	302	0.65	-40.06	0.48	-20.14	0.34
2_irregular_conc_4_spot_1	151	0.33	-44.12	0.43	-23.85	0.46
2_irregular_conc_4_spot_2	184	0.40	-45.71	0.3	-24.11	0.5
2_irregular_conc_4_spot_3	180	0.39	-45.47	0.32	-23.18	0.31
2_irregular_conc_4_spot_4	252	0.55	-40.57	0.45	-21.64	0.46
2_irregular_conc_4_spot_5	292	0.63	-38.66	0.41	-19.65	0.29
2_irregular_conc_4_spot_6	317	0.69	-40.46	0.4	-21.04	0.28
2_irregular_conc_4_spot_7	298	0.65	-44.58	0.34	-23.37	0.29
2_irregular_conc_4_spot_8	294	0.64	-42.22	0.43	-21.56	0.31
2_irregular_conc_4_spot_9	311	0.67	-44.40	0.41	-23.11	0.35
2_irregular_conc_5_spot_1	47	0.10	-41.14	0.54	-20.46	1.2
2_irregular_conc_5_spot_2	297	0.64	-43.50	0.4	-23.59	0.32
2_irregular_conc_5_spot_3	310	0.67	-34.97	0.41	-17.95	0.29
2_irregular_conc_5_spot_4	317	0.69	-29.04	0.54	-14.78	0.3
2_irregular_conc_5_spot_5	308	0.67	-36.08	0.5	-18.64	0.38
2_irregular_conc_5_spot_6	305	0.66	-38.93	0.39	-20.31	0.31
2_irregular_conc_5_spot_7	303	0.66	-36.93	0.37	-19.45	0.29
2_irregular_conc_5_spot_8	312	0.68	-37.53	0.4	-19.43	0.34
2_irregular_conc_5_spot_9	305	0.66	-37.73	0.43	-19.50	0.34
2_irregular_conc_5_spot_10	295	0.64	-39.19	0.63	-20.20	0.45
2_irregular_conc_5_spot_11	291	0.63	-44.64	0.39	-23.15	0.27
2_irregular_conc_5_spot_12	62	0.13	-41.97	0.36	-20.66	0.63
2_burrow-like_conc_6_fram_13	301	0.65	-8.98	0.43	-4.00	0.32
2_burrow-like_conc_6_fram_14	299	0.65	26.35	0.5	13.36	0.34
2_burrow-like_conc_6_matrix_13	290	0.63	-38.58	0.42	-20.24	0.38
2_burrow-like_conc_6_matrix_14	302	0.65	-38.99	0.4	-20.11	0.31
Sample 3 (barite concretions at 175-171 cm in MGML-06-7)
3_burrow-like_1	457	2.13	80.40	0.45	41.45	0.42
3_burrow-like_2	484	2.26	80.71	0.41	41.38	0.42
3_burrow-like_3	504	2.35	82.63	0.36	42.49	0.4
3_burrow-like_4	506	2.36	82.28	0.39	42.16	0.41
3_burrow-like_5	511	2.39	81.16	0.4	42.04	0.42
3_burrow-like_6	440	2.05	81.40	0.37	41.56	0.4
3_burrow-like_7	439	2.05	81.10	0.38	42.27	0.39
3_irregular_1	519	2.42	81.48	0.43	41.83	0.44
3_irregular_2	420	1.96	81.38	0.38	41.40	0.42
3_irregular_3	575	2.69	79.35	0.36	41.00	0.39
3_irregular_4	523	2.44	78.79	0.38	40.49	0.43
3_irregular_5	387	1.81	78.94	0.39	40.76	0.41
Thin sections
Sample 4 (113.8 - 109.0 cm in AS2-VH3)
4_clustered_framboid_1	536	1.12	-32.75	0.39	-17.21	0.25
4_clustered_framboid_2	515	1.07	-13.53	0.4	-7.11	0.3
4_clustered_framboid_3	476	0.99	-27.70	0.41	-14.13	0.24
4_clustered_framboid_4	535	1.11	-8.86	0.48	-4.55	0.28
4_clustered_framboid_5	448	0.93	11.49	0.49	5.68	0.29
4_clustered_framboid_6	455	0.95	20.43	0.51	10.63	0.24
4_clustered_framboid_7	467	0.97	29.40	0.52	15.65	0.25
4_clustered_framboid_8	481	1.00	50.51	0.5	25.82	0.25
4_clustered_framboid_9	506	1.05	-4.10	0.47	-2.01	0.24
4_clustered_framboid_10	458	0.95	27.75	0.51	14.18	0.24
4_clustered_framboid_11	456	0.95	18.44	0.5	9.52	0.26
4_clustered_framboid_12	445	0.93	33.52	0.52	17.14	0.25
4_clustered_framboid_13	426	0.89	9.76	0.49	5.65	0.28
4_clustered_framboid_cement_1	534	1.11	-36.19	0.45	-18.84	0.29
4_clustered_framboid_cement_2	785	1.63	-30.58	0.4	-15.77	0.25
4_clustered_framboid_cement_3	482	1.00	-26.02	0.4	-13.65	0.25
4_clustered_framboid_cement_4	98	0.20	-35.89	0.61	-19.88	0.6
4_clustered_framboid_cement_5	561	1.17	19.02	0.48	9.97	0.25
4_clustered_framboid_cement_6	501	1.04	-23.57	0.5	-12.25	0.26
4_clustered_framboid_cement_7	467	0.97	-42.45	0.6	-22.16	0.34
4_clustered_framboid_cement_8	657	1.37	-40.50	0.7	-20.83	0.37
4_clustered_framboid_cement_9	411	0.86	-39.76	0.47	-20.70	0.25
4_clustered_framboid_cement_10	496	1.03	-9.57	0.58	-4.68	0.31
4_clustered_framboid_cement_11	400	0.83	-40.38	0.53	-20.88	0.34
4_clustered_framboid_cement_12	498	1.04	-40.19	0.47	-20.95	0.24
4_clustered_framboid_cement_13	309	0.64	-51.14	0.63	-26.47	0.3
4_clustered_framboid_cement_14	408	0.85	-31.28	0.47	-16.96	0.26
4_single_framboid_2	611	1.27	-18.69	0.95	-9.81	0.51
4_single_framboid_3	822	1.71	-8.79	0.49	-4.51	0.24
4_single_framboid_4	540	1.12	-16.79	1.5	-8.57	0.74
4_single_framboid_5	343	0.71	-32.20	0.49	-16.24	0.26
4_single_framboid_6	463	0.96	-40.10	0.47	-20.57	0.24
4_single_framboid_7	298	0.62	-38.74	0.81	-20.48	0.47
4_single_framboid_8	470	0.98	-30.77	1	-15.64	0.5
4_single_framboid_9	504	1.05	-37.62	0.5	-19.47	0.27
4_single_framboid_10	449	0.93	-40.74	0.47	-21.60	0.25
4_single_framboid_11	640	1.33	-40.66	0.47	-20.97	0.24
Sample 5 (90.0 - 85.7 cm in AS2-VH3)
5_clustered_framboid_1	503	1.14	-7.97	0.33	-4.26	0.28
5_clustered_framboid_2	583	1.33	-3.93	0.33	-1.81	0.3
5_clustered_framboid_3	526	1.20	-4.89	0.21	-2.46	0.26
5_clustered_framboid_4	507	1.15	-12.04	0.23	-6.17	0.27
5_clustered_framboid_5	527	1.20	-9.55	0.25	-4.45	0.32
5_clustered_framboid_6	482	1.09	-0.65	0.3	-0.21	0.28
5_clustered_framboid_7	516	1.17	-5.13	0.69	-2.69	0.43
5_clustered_framboid_8	511	1.16	-9.24	0.22	-5.09	0.28
5_clustered_framboid_9	531	1.21	-9.14	0.3	-4.76	0.29
5_clustered_framboid_10	548	1.25	-12.76	0.47	-6.67	0.35
5_clustered_framboid_11	510	1.16	-15.17	0.26	-7.91	0.28
5_clustered_framboid_12	504	1.15	-15.35	0.21	-8.00	0.29
5_clustered_framboid_13	469	1.07	-6.38	0.27	-3.19	0.28
5_clustered_framboid_14	669	1.52	-10.59	0.19	-5.41	0.27
5_clustered_framboid_15	409	0.93	34.74	0.23	17.80	0.27
5_clustered_framboid_16	406	0.92	-2.76	0.42	-1.27	0.33
5_clustered_framboid_17	523	1.19	-7.32	0.2	-3.66	0.28
5_clustered_framboid_cement_1	476	1.08	-27.76	0.37	-14.50	0.35
5_clustered_framboid_cement_2	527	1.20	-21.59	0.6	-11.47	0.45
5_clustered_framboid_cement_3	770	1.75	-11.78	0.36	-5.91	0.33
5_clustered_framboid_cement_4	438	1.00	-22.09	0.35	-11.49	0.36
5_clustered_framboid_cement_5	396	0.90	-34.31	0.43	-17.72	0.36
5_clustered_framboid_cement_6	561	1.27	-23.04	0.63	-11.71	0.41
5_clustered_framboid_cement_7	116	0.26	-40.53	0.27	-19.81	0.62
5_single_framboid_1	431	0.98	-26.71	0.32	-13.98	0.33
5_single_framboid_2	432	0.98	-32.77	0.19	-16.82	0.28
5_single_framboid_3	375	0.85	-11.91	0.83	-6.09	0.51
